# Supplementary material for: Development of a prognostic RiskScore model using efferocytosis-related signature genes for lung adenocarcinoma
Source: PeerJ. 2025 Sep 5;13:e19892. doi: 10.7717/peerj.19892 (PMC12422274; doi:10.7717/peerj.19892)
Supplement: Supplemental Information 3 [file peerj-13-19892-s003.xls]

## Sheet: Sheet1
ITEM TO CHECK	IMPORTANCE	CHECKLIST
EXPERIMENTAL DESIGN
Definition of experimental and control groups	E	p9line194-196
Number within each group	E	p9line194-196
Assay carried out by core lab or investigator's lab?	D	Not Applicable
Acknowledgement of authors' contributions	D	Not Applicable
SAMPLE
Description	E	p10line208-216
Volume/mass of sample processed	D	Not Applicable
Microdissection or macrodissection	E	p10line208-216
Processing procedure	E	p10line208-216
If frozen - how and how quickly?	E	p10line208-216
If fixed - with what, how quickly?	E	p10line208-216
Sample storage conditions and duration (especially for FFPE samples)	E	p10line208-216
NUCLEIC ACID EXTRACTION
Procedure and/or instrumentation	E	p10line208-216
Name of kit and details of any modifications	E	p10line208-216
Source of additional reagents used	D	Not Applicable
Details of DNase or RNAse treatment	E	p10line208-216
Contamination assessment (DNA or RNA)	E	p10line208-216
Nucleic acid quantification	E	p10line208-216
Instrument and method	E	p10line208-216
Purity (A260/A280)	D	Not Applicable
Yield	D	Not Applicable
RNA integrity method/instrument	E	p10line208-216
RIN/RQI or Cq of 3' and 5' transcripts	E	p10line208-216
Electrophoresis traces	D	Not Applicable
Inhibition testing (Cq dilutions, spike or other)	E	p10line208-216
REVERSE TRANSCRIPTION
Complete reaction conditions	E	p10line208-216
Amount of RNA and reaction volume	E	p10line208-216
Priming oligonucleotide (if using GSP) and concentration	E	p10line208-216
Reverse transcriptase and concentration	E	p10line208-216
Temperature and time	E	p10line208-216
Manufacturer of reagents and catalogue numbers	D	Not Applicable
Cqs with and without RT	D*	Not Applicable
Storage conditions of cDNA	D	Not Applicable
qPCR TARGET INFORMATION
If multiplex, efficiency and LOD of each assay.	E	p10line208-216
Sequence accession number	E	p10line208-216
Location of amplicon	D	Not Applicable
Amplicon length	E	p10line208-216
In silico specificity screen (BLAST, etc)	E	p10line208-216
Pseudogenes, retropseudogenes or other homologs?	D	Not Applicable
Sequence alignment	D	Not Applicable
Secondary structure analysis of amplicon	D	Not Applicable
Location of each primer by exon or intron (if applicable)	E	p10line208-216
What splice variants are targeted?	E	p10line208-216
qPCR OLIGONUCLEOTIDES
Primer sequences	E	p10line208-216
RTPrimerDB Identification Number	D	Not Applicable
Probe sequences	D**	Not Applicable
Location and identity of any modifications	E	p10line208-216
Manufacturer of oligonucleotides	D	Not Applicable
Purification method	D	Not Applicable
qPCR PROTOCOL
Complete reaction conditions	E	p10line208-216
Reaction volume and amount of cDNA/DNA	E	p10line208-216
Primer, (probe), Mg++ and dNTP concentrations	E	p10line208-216
Polymerase identity and concentration	E	p10line208-216
Buffer/kit identity and manufacturer	E	p10line208-216
Exact chemical constitution of the buffer	D	Not Applicable
Additives (SYBR Green I, DMSO, etc.)	E	p10line208-216
Manufacturer of plates/tubes and catalog number	D	Not Applicable
Complete thermocycling parameters	E	p10line208-216
Reaction setup (manual/robotic)	D	Not Applicable
Manufacturer of qPCR instrument	E	p10line208-216
qPCR VALIDATION
Evidence of optimisation (from gradients)	D	Not Applicable
Specificity (gel, sequence, melt, or digest)	E	p10line208-216
For SYBR Green I, Cq of the NTC	E	p10line208-216
Standard curves with slope and y-intercept	E	p10line208-216
PCR efficiency calculated from slope	E	p10line208-216
Confidence interval for PCR efficiency or standard error	D	Not Applicable
r2 of standard curve	E	p10line208-216
Linear dynamic range	E	p10line208-216
Cq variation at lower limit	E	p10line208-216
Confidence intervals throughout range	D	Not Applicable
Evidence for limit of detection	E	p10line208-216
If multiplex, efficiency and LOD of each assay.	E	p10line208-216
DATA ANALYSIS
qPCR analysis program (source, version)	E	p10line208-216
Cq method determination	E	p10line208-216
Outlier identification and disposition	E	p10line208-216
Results of NTCs	E	p10line208-216
Justification of number and choice of reference genes	E	p10line208-216
Description of normalisation method	E	p10line208-216
Number and concordance of biological replicates	D	Not Applicable
Number and stage (RT or qPCR) of technical replicates	E	p10line208-216
Repeatability (intra-assay variation)	E	p10line208-216
Reproducibility (inter-assay variation, %CV)	D	Not Applicable
Power analysis	D	Not Applicable
Statistical methods for result significance	E	p10line208-216
Software (source, version)	E	p10line208-216
Cq or raw data submission using RDML	D	Not Applicable
Table 1. MIQE checklist for authors, reviewers and editors. All essential information (E) must be submitted with the manuscript. Desirable
information (D) should be submitted if available. If using primers obtained from RTPrimerDB, information on qPCR target, oligonucleotides,
protocols and validation is available from that source.
*: Assessing the absence of DNA using a no RT assay is essential when first extracting RNA. Once the sample has been validated as
RDNA-free, inclusion of a no-RT control is desirable, but no longer essential.
**: Disclosure of the probe sequence is highly desirable and strongly encouraged. However, since not all commercial pre-designed assay
vendors provide this information, it cannot be an essential requirement. Use of such assays is advised against.
